# Supplementary material for: Comparing catch efficiency of five models of pot for use in a Newfoundland and Labrador cod fishery
Source: PLoS One. 2018 Jun 27;13(6):e0199702. doi: 10.1371/journal.pone.0199702 (PMC6021105; doi:10.1371/journal.pone.0199702)
Supplement: S2 File — Total catch and length data collected for marine species caught using experimental cod pots during the August and September 2016 field season. (XLSX) [file pone.0199702.s002.xlsx]

## Sheet: Pot Deployment Data
GroupID	GroupName	PotID	PotName	PotType	DateIn	TimeIn	LatDegIn	LatMinSecIn	LongDeg	LongMinSec	DepthIn	DateOut	TimeOut	LatDegOut	LatMinSecOut	LongDegOut	LongMinSecOut	DepthOut	Camera	Storm	Damaged	Notes
1	G1	1	B	NOR	22/08/16	12:52:54	49	40.21	53	59.24	18.9	23/08/16	14:32:15	49	40.17	53	59.22	18	N	N	N	NOR Pot had one entrance for first two deployments
1	G1	2	C	Phil	22/08/16	12:52:54	49	40.21	53	59.24	18.9	23/08/16	14:32:15	49	40.17	53	59.22	18	N	N	N
1	G1	3	D	NORMod	22/08/16	12:52:54	49	40.21	53	59.24	18.9	23/08/16	14:32:15	49	40.17	53	59.22	18	N	N	N
1	G1	4	E	NL	22/08/16	12:52:54	49	40.21	53	59.24	18.9	23/08/16	14:32:15	49	40.17	53	59.22	18	N	N	N
1	G1	5	F	NLMod	22/08/16	12:52:54	49	40.21	53	59.24	18.9	23/08/16	14:32:15	49	40.17	53	59.22	18	N	N	Y	Bait Bag Fail
2	G2	6	G	NOR	22/08/16	12:48:56	49	40.04	53	58.76	25.4	23/08/16	13:13:29	49	39.98	53	58.65	26.3	N	N	N
2	G2	7	H	Phil	22/08/16	12:48:56	49	40.04	53	58.76	25.4	23/08/16	13:13:29	49	39.98	53	58.65	26.3	N	N	Y	Mesh Broken
2	G2	8	I	NORMod	22/08/16	12:48:56	49	40.04	53	58.76	25.4	23/08/16	13:13:29	49	39.98	53	58.65	26.3	N	N	N
2	G2	9	K	NL	22/08/16	12:48:56	49	40.04	53	58.76	25.4	23/08/16	13:13:29	49	39.98	53	58.65	26.3	N	N	N
2	G2	10	L	NLMod	22/08/16	12:48:56	49	40.04	53	58.76	25.4	23/08/16	13:13:29	49	39.98	53	58.65	26.3	N	N	N
3	G3	11	M	NORMod	22/08/16	11:57:43	49	37.98	54	1.69	18.3	23/08/16	16:07:44	49	38.03	54	1.53	24	N	N	N
3	G3	12	O	Phil	22/08/16	11:57:43	49	37.98	54	1.69	18.3	23/08/16	16:07:44	49	38.03	54	1.53	24	N	N	N
3	G3	13	P	NOR	22/08/16	11:57:43	49	37.98	54	1.69	18.3	23/08/16	16:07:44	49	38.03	54	1.53	24	N	N	N
3	G3	14	Q	NL	22/08/16	13:52:48	49	37.98	54	1.69	18.3	23/08/16	16:07:44	49	38.03	54	1.53	24	N	N	N
3	G3	15	R	NLMod	22/08/16	11:57:43	49	37.98	54	1.69	18.3	23/08/16	16:07:44	49	38.03	54	1.53	24	N	N	N
4	G4	16	S	NOR	22/08/16	11:44:22	49	37.18	54	1.91	19	24/08/16	12:00:00	49	37.19	54	1.77	22.6	N	N	N
4	G4	17	T	NORMod	22/08/16	11:44:22	49	37.18	54	1.91	19	24/08/16	12:00:00	49	37.19	54	1.77	22.6	N	N	N
4	G4	18	V	Phil	22/08/16	11:44:22	49	37.18	54	1.91	19	24/08/16	12:00:00	49	37.19	54	1.77	22.6	N	N	N
4	G4	19	W	NL	22/08/16	14:13:31	49	37.18	54	1.91	19	24/08/16	12:00:00	49	37.19	54	1.77	22.6	N	N	N
4	G4	20	X	NLMod	22/08/16	11:44:22	49	37.18	54	1.91	19	24/08/16	12:00:00	49	37.19	54	1.77	22.6	N	N	N
5	G5	21	Y	Phil	22/08/16	11:27:00	49	36.98	54	1.8	25.8	24/08/16	13:00:00	49	36.97	54	1.92	24.8	N	N	N
5	G5	22	Z	NOR	22/08/16	11:27:00	49	36.98	54	1.8	25.8	24/08/16	13:00:00	49	36.97	54	1.92	24.8	N	N	N
5	G5	23	A2	NORMod	22/08/16	11:27:00	49	36.98	54	1.8	25.8	24/08/16	13:00:00	49	36.97	54	1.92	24.8	N	N	N
5	G5	24	C2	NL	22/08/16	14:43:38	49	36.98	54	1.8	25.8	24/08/16	13:00:00	49	36.97	54	1.92	24.8	N	N	N
5	G5	25	D2	NLMod	22/08/16	11:27:00	49	36.98	54	1.8	25.8	24/08/16	13:00:00	49	36.97	54	1.92	24.8	N	N	N
6	G2	26	G	NOR	23/08/16	13:49:56	49	40.09	53	58.31	29.6	24/08/16	15:48:00	49	40.05	53	58.26	31.7	N	N	N
6	G2	27	H	Phil	23/08/16	13:49:56	49	40.09	53	58.31	29.6	24/08/16	15:48:00	49	40.05	53	58.26	31.7	N	N	N
6	G2	28	I	NORMod	23/08/16	13:49:56	49	40.09	53	58.31	29.6	24/08/16	15:48:00	49	40.05	53	58.26	31.7	N	N	N
6	G2	29	K	NL	23/08/16	13:49:56	49	40.09	53	58.31	29.6	24/08/16	15:48:00	49	40.05	53	58.26	31.7	N	N	N
6	G2	30	L	NLMod	23/08/16	13:49:56	49	40.09	53	58.31	29.6	24/08/16	15:48:00	49	40.05	53	58.26	31.7	N	N	N
7	G1	31	B	NOR	23/08/16	15:30:16	49	40.41	53	58.97	24	24/08/16	16:54:00	49	40.39	53	58.85	23.7	N	N	N
7	G1	32	C	Phil	23/08/16	15:30:16	49	40.41	53	58.97	24	24/08/16	16:54:00	49	40.39	53	58.85	23.7	N	N	N
7	G1	33	D	NORMod	23/08/16	15:30:16	49	40.41	53	58.97	24	24/08/16	16:54:00	49	40.39	53	58.85	23.7	N	N	N
7	G1	34	E	NL	23/08/16	15:30:16	49	40.41	53	58.97	24	24/08/16	16:54:00	49	40.39	53	58.85	23.7	N	N	N
7	G1	35	F	NLMod	23/08/16	15:30:16	49	40.41	53	58.97	24	24/08/16	16:54:00	49	40.39	53	58.85	23.7	N	N	N
8	G3	36	M	NORMod	23/08/16	16:40:09	49	38.1	54	1.59	23	24/08/16	14:36:00	49	38.07	54	1.57	23.8	N	N	N
8	G3	37	O	Phil	23/08/16	16:40:09	49	38.1	54	1.59	23	24/08/16	14:36:00	49	38.07	54	1.57	23.8	N	N	N
8	G3	38	P	NOR	23/08/16	16:40:09	49	38.1	54	1.59	23	24/08/16	14:36:00	49	38.07	54	1.57	23.8	N	N	N
8	G3	39	Q	NL	23/08/16	16:40:09	49	38.1	54	1.59	23	24/08/16	14:36:00	49	38.07	54	1.57	23.8	N	N	N
8	G3	40	R	NLMod	23/08/16	16:40:09	49	38.1	54	1.59	23	24/08/16	14:36:00	49	38.07	54	1.57	23.8	N	N	N
9	G4	41	S	NOR	24/08/16	12:18:00	49	36.98	54	1.23	29.3	25/08/16	11:54:02	49	37.02	54	1.27	26	N	N	N
9	G4	42	T	NORMod	24/08/16	12:18:00	49	36.98	54	1.23	29.3	25/08/16	11:54:02	49	37.02	54	1.27	26	N	N	N
9	G4	43	V	Phil	24/08/16	12:18:00	49	36.98	54	1.23	29.3	25/08/16	11:54:02	49	37.02	54	1.27	26	N	N	N
9	G4	44	W	NL	24/08/16	12:18:00	49	36.98	54	1.23	29.3	25/08/16	11:54:02	49	37.02	54	1.27	26	N	N	N
9	G4	45	X	NLMod	24/08/16	12:18:00	49	36.98	54	1.23	29.3	25/08/16	11:54:02	49	37.02	54	1.27	26	N	N	N
10	G5	46	Y	Phil	24/08/16	13:21:00	49	37.04	54	1.97	22.8	25/08/16	12:55:16	49	37.06	54	1.92	22.9	N	N	N
10	G5	47	Z	NOR	24/08/16	13:21:00	49	37.04	54	1.97	22.8	25/08/16	12:55:16	49	37.06	54	1.92	22.9	N	N	N
10	G5	48	A2	NORMod	24/08/16	13:21:00	49	37.04	54	1.97	22.8	25/08/16	12:55:16	49	37.06	54	1.92	22.9	N	N	N
10	G5	49	C2	NL	24/08/16	13:21:00	49	37.04	54	1.97	22.8	25/08/16	12:55:16	49	37.06	54	1.92	22.9	N	N	N
10	G5	50	D2	NLMod	24/08/16	13:21:00	49	37.04	54	1.97	22.8	25/08/16	12:55:16	49	37.06	54	1.92	22.9	N	N	N
11	G3	51	M	NORMod	24/08/16	14:55:00	49	38.03	54	1.63	21.7	25/08/16	10:38:23	49	38.08	54	1.55	23.8	N	N	N
11	G3	52	O	Phil	24/08/16	14:55:00	49	38.03	54	1.63	21.7	25/08/16	10:38:23	49	38.08	54	1.55	23.8	N	N	N
11	G3	53	P	NOR	24/08/16	14:55:00	49	38.03	54	1.63	21.7	25/08/16	10:38:23	49	38.08	54	1.55	23.8	N	N	N
11	G3	54	Q	NL	24/08/16	14:55:00	49	38.03	54	1.63	21.7	25/08/16	10:38:23	49	38.08	54	1.55	23.8	N	N	N
11	G3	55	R	NLMod	24/08/16	14:55:00	49	38.03	54	1.63	21.7	25/08/16	10:38:23	49	38.08	54	1.55	23.8	N	N	N
12	G2	56	G	NOR	24/08/16	16:05:00	49	40.05	53	58.22	31.5	25/08/16	08:38:42	49	40.03	53	58.27	30.9	N	N	N
12	G2	57	H	Phil	24/08/16	16:05:00	49	40.05	53	58.22	31.5	25/08/16	08:38:42	49	40.03	53	58.27	30.9	N	N	N
12	G2	58	I	NORMod	24/08/16	16:05:00	49	40.05	53	58.22	31.5	25/08/16	08:38:42	49	40.03	53	58.27	30.9	N	N	N
12	G2	59	K	NL	24/08/16	16:05:00	49	40.05	53	58.22	31.5	25/08/16	08:38:42	49	40.03	53	58.27	30.9	N	N	N
12	G2	60	L	NLMod	24/08/16	16:05:00	49	40.05	53	58.22	31.5	25/08/16	08:38:42	49	40.03	53	58.27	30.9	N	N	N
13	G1	61	B	NOR	24/08/16	17:11:00	49	40.36	53	58.61	20.2	25/08/16	07:45:31	49	40.3	53	58.51	18.7	N	N	N
13	G1	62	C	Phil	24/08/16	17:11:00	49	40.36	53	58.61	20.2	25/08/16	07:45:31	49	40.3	53	58.51	18.7	N	N	Y	Bait Bag Fail
13	G1	63	D	NORMod	24/08/16	17:11:00	49	40.36	53	58.61	20.2	25/08/16	07:45:31	49	40.3	53	58.51	18.7	N	N	N
13	G1	64	E	NL	24/08/16	17:11:00	49	40.36	53	58.61	20.2	25/08/16	07:45:31	49	40.3	53	58.51	18.7	N	N	N
13	G1	65	F	NLMod	24/08/16	17:11:00	49	40.36	53	58.61	20.2	25/08/16	07:45:31	49	40.3	53	58.51	18.7	N	N	N
14	G1	66	B	NOR	25/08/16	07:57:02	49	40.2	54	58.39	21.6	29/08/16	09:43:19	49	40.33	54	58.1	21.9	N	N	N
14	G1	67	C	Phil	25/08/16	07:57:02	49	40.2	54	58.39	21.6	29/08/16	09:43:19	49	40.33	54	58.1	21.9	N	N	N
14	G1	68	D	NORMod	25/08/16	07:57:02	49	40.2	54	58.39	21.6	29/08/16	09:43:19	49	40.33	54	58.1	21.9	N	N	N
14	G1	69	E	NL	25/08/16	07:57:02	49	40.2	54	58.39	21.6	29/08/16	09:43:19	49	40.33	54	58.1	21.9	N	N	N
14	G1	70	F	NLMod	25/08/16	07:57:02	49	40.2	54	58.39	21.6	29/08/16	09:43:19	49	40.33	54	58.1	21.9	N	N	N	Seal bycatch
15	G2	71	G	NOR	25/08/16	09:00:51	49	40.09	53	58.1	31	29/08/16	08:06:16	49	40.08	53	58.16	31.8	N	N	N
15	G2	72	H	Phil	25/08/16	09:00:51	49	40.09	53	58.1	31	29/08/16	08:06:16	49	40.08	53	58.16	31.8	N	N	N
15	G2	73	I	NORMod	25/08/16	09:00:51	49	40.09	53	58.1	31	29/08/16	08:06:16	49	40.08	53	58.16	31.8	N	N	N
15	G2	74	K	NL	25/08/16	09:00:51	49	40.09	53	58.1	31	29/08/16	08:06:16	49	40.08	53	58.16	31.8	N	N	N
15	G2	75	L	NLMod	25/08/16	09:00:51	49	40.09	53	58.1	31	29/08/16	08:06:16	49	40.08	53	58.16	31.8	N	N	N
16	G3	76	M	NORMod	25/08/16	10:59:21	49	38.16	54	1.46	24.3	29/08/16	13:49:18	49	38.08	54	1.54	24	N	N	N
16	G3	77	O	Phil	25/08/16	10:59:21	49	38.16	54	1.46	24.3	29/08/16	13:49:18	49	38.08	54	1.54	24	N	N	N
16	G3	78	P	NOR	25/08/16	10:59:21	49	38.16	54	1.46	24.3	29/08/16	13:49:18	49	38.08	54	1.54	24	N	N	N
16	G3	79	Q	NL	25/08/16	10:59:21	49	38.16	54	1.46	24.3	29/08/16	13:49:18	49	38.08	54	1.54	24	N	N	N
16	G3	80	R	NLMod	25/08/16	10:59:21	49	38.16	54	1.46	24.3	29/08/16	13:49:18	49	38.08	54	1.54	24	N	N	N
17	G4	81	S	NOR	25/08/16	12:04:24	49	37.01	54	1.2	28.7	26/08/16	11:03:00	49	37.05	54	1.17	29.8	N	N	N
17	G4	82	T	NORMod	25/08/16	12:04:24	49	37.01	54	1.2	28.7	26/08/16	11:03:00	49	37.05	54	1.17	29.8	N	N	N
17	G4	83	V	Phil	25/08/16	12:04:24	49	37.01	54	1.2	28.7	26/08/16	11:03:00	49	37.05	54	1.17	29.8	N	N	N
17	G4	84	W	NL	25/08/16	12:04:24	49	37.01	54	1.2	28.7	26/08/16	11:03:00	49	37.05	54	1.17	29.8	N	N	N
17	G4	85	X	NLMod	25/08/16	12:04:24	49	37.01	54	1.2	28.7	26/08/16	11:03:00	49	37.05	54	1.17	29.8	N	N	N	Open Zipper
18	G5	86	Y	Phil	25/08/16	13:13:45	49	37.11	54	1.69	26.1	26/08/16	09:39:00	49	36.98	54	1.78	26.1	N	N	N
18	G5	87	Z	NOR	25/08/16	13:13:45	49	37.11	54	1.69	26.1	26/08/16	09:39:00	49	36.98	54	1.78	26.1	N	N	N
18	G5	88	A2	NORMod	25/08/16	13:13:45	49	37.11	54	1.69	26.1	26/08/16	09:39:00	49	36.98	54	1.78	26.1	N	N	N
18	G5	89	C2	NL	25/08/16	13:13:45	49	37.11	54	1.69	26.1	26/08/16	09:39:00	49	36.98	54	1.78	26.1	N	N	N
18	G5	90	D2	NLMod	25/08/16	13:13:45	49	37.11	54	1.69	26.1	26/08/16	09:39:00	49	36.98	54	1.78	26.1	N	N	N
19	G5	91	Y	Phil	26/08/16	09:48:00	49	36.98	54	1.68	26.4	29/08/16	15:56:00	49	37.01	54	1.64	26.5	N	N	N
19	G5	92	Z	NOR	26/08/16	09:48:00	49	36.98	54	1.68	26.4	29/08/16	15:56:00	49	37.01	54	1.64	26.5	N	N	N
19	G5	93	A2	NORMod	26/08/16	09:48:00	49	36.98	54	1.68	26.4	29/08/16	15:56:00	49	37.01	54	1.64	26.5	N	N	N
19	G5	94	C2	NL	26/08/16	09:48:00	49	36.98	54	1.68	26.4	29/08/16	15:56:00	49	37.01	54	1.64	26.5	N	N	N
19	G5	95	D2	NLMod	26/08/16	09:48:00	49	36.98	54	1.68	26.4	29/08/16	15:56:00	49	37.01	54	1.64	26.5	N	N	N
20	G4	96	S	NOR	26/08/16	10:52:00	49	37.04	54	1.15	27.3	29/08/16	12:40:35	49	37.02	54	0.94	32.9	N	N	N
20	G4	97	T	NORMod	26/08/16	10:52:00	49	37.04	54	1.15	27.3	29/08/16	12:40:35	49	37.02	54	0.94	32.9	N	N	N
20	G4	98	V	Phil	26/08/16	10:52:00	49	37.04	54	1.15	27.3	29/08/16	12:40:35	49	37.02	54	0.94	32.9	N	N	N
20	G4	99	W	NL	26/08/16	10:52:00	49	37.04	54	1.15	27.3	29/08/16	12:40:35	49	37.02	54	0.94	32.9	N	N	N
20	G4	100	X	NLMod	26/08/16	10:52:00	49	37.04	54	1.15	27.3	29/08/16	12:40:35	49	37.02	54	0.94	32.9	N	N	N
21	G1	101	B	NOR	29/08/16	10:21:30	49	40.35	54	58.39	24.1	2016-01-09	14:14:00	49	40.4	54	58.3	26	N	Y	N
21	G1	102	C	Phil	29/08/16	10:21:30	49	40.35	54	58.39	24.1	2016-01-09	14:14:00	49	40.4	54	58.3	26	N	Y	N	Bent Frame, Dead Cod
21	G1	103	D	NORMod	29/08/16	10:21:30	49	40.35	54	58.39	24.1	2016-01-09	14:14:00	49	40.4	54	58.3	26	N	Y	Y	Mesh Broken
21	G1	104	E	NL	29/08/16	10:21:30	49	40.35	54	58.39	24.1	2016-01-09	14:14:00	49	40.4	54	58.3	26	N	Y	N
21	G1	105	F	NLMod	29/08/16	10:21:30	49	40.35	54	58.39	24.1	2016-01-09	14:14:00	49	40.4	54	58.3	26	N	Y	N
22	G2	106	G	NOR	29/08/16	08:19:45	49	40.19	53	59.23	28.7	2016-01-09	15:14:00	49	39.29	53	57.15	29.3	N	Y	N
22	G2	107	H	Phil	29/08/16	08:19:45	49	40.19	53	59.23	28.7	2016-01-09	15:14:00	49	39.29	53	57.15	29.3	N	Y	Y	Mesh Broken
22	G2	108	I	NORMod	29/08/16	08:19:45	49	40.19	53	59.23	28.7	2016-01-09	15:14:00	49	39.29	53	57.15	29.3	N	Y	Y	Mesh Broken
22	G2	109	K	NL	29/08/16	08:19:45	49	40.19	53	59.23	28.7	2016-01-09	13:51:00	49	40.16	53	58.24	27.8	N	Y	N
22	G2	110	L	NLMod	29/08/16	08:19:45	49	40.19	53	59.23	28.7	2016-01-09	13:51:00	49	40.16	53	58.24	27.8	N	Y	N
23	G3	111	M	NORMod	29/08/16	14:00:30	49	38.05	54	1.56	23.4	2016-01-09	17:00:00	49	38.08	54	1.47	23.8	N	Y	N
23	G3	112	O	Phil	29/08/16	14:00:30	49	38.05	54	1.56	23.4	2016-01-09	17:00:00	49	38.08	54	1.47	23.8	N	Y	Y	Mesh Broken
23	G3	113	P	NOR	29/08/16	14:00:30	49	38.05	54	1.56	23.4	2016-01-09	17:00:00	49	38.08	54	1.47	23.8	N	Y	N
23	G3	114	Q	NL	29/08/16	14:00:30	49	38.05	54	1.56	23.4	2016-01-09	17:00:00	49	38.08	54	1.47	23.8	N	Y	N
23	G3	115	R	NLMod	29/08/16	14:00:30	49	38.05	54	1.56	23.4	2016-01-09	17:00:00	49	38.08	54	1.47	23.8	N	Y	N
24	G4	116	S	NOR	29/08/16	13:37:21	49	36.95	54	1.16	32.3	2016-02-09	08:31:17	49	36.99	54	1.1	30.7	N	Y	N
24	G4	117	T	NORMod	29/08/16	13:37:21	49	36.95	54	1.16	32.3	2016-02-09	08:31:17	49	36.99	54	1.1	30.7	N	Y	Y	Mesh Broken, Zero Fish, Many Holes, Sea Lice in Pot, Dead fish carcass
24	G4	118	V	Phil	29/08/16	13:37:21	49	36.95	54	1.16	32.3	2016-02-09	08:31:17	49	36.99	54	1.1	30.7	N	Y	N
24	G4	119	W	NL	29/08/16	13:37:21	49	36.95	54	1.16	32.3	2016-02-09	08:31:17	49	36.99	54	1.1	30.7	N	Y	N
24	G4	120	X	NLMod	29/08/16	13:37:21	49	36.95	54	1.16	32.3	2016-02-09	08:31:17	49	36.99	54	1.1	30.7	N	Y	N
25	G5	121	Y	Phil	29/08/16	16:11:00	49	37.01	54	1.52	25.3	2016-02-09	10:02:54	49	37.04	54	1.58	26.5	N	Y	Y	Mesh Broken
25	G5	122	Z	NOR	29/08/16	16:11:00	49	37.01	54	1.52	25.3	2016-02-09	10:02:54	49	37.04	54	1.58	26.5	N	Y	N	All fish dead or damaged.
25	G5	123	A2	NORMod	29/08/16	16:11:00	49	37.01	54	1.52	25.3	2016-02-09	10:02:54	49	37.04	54	1.58	26.5	N	Y	N
25	G5	124	C2	NL	29/08/16	16:11:00	49	37.01	54	1.52	25.3	2016-02-09	10:02:54	49	37.04	54	1.58	26.5	N	Y	N
25	G5	125	D2	NLMod	29/08/16	16:11:00	49	37.01	54	1.52	25.3	2016-02-09	10:02:54	49	37.04	54	1.58	26.5	N	Y	N

## Sheet: Pot Catch
PotID	Species	Length	Count	Notes
1	cod	57	1
1	cod	69	1
1	cod	46	1
1	cod	42	1
1	cod	58	1
1	cod	61	1
1	cod	43	1
1	cod	43	1
1	cod	37	1
1	cod	44	1
1	cod	34	1
1	cod	82	1
1	cod	62	1
1	cod	62	1
1	cod	61	1
1	cod	67	1
1	cod	64	1
1	cod	45	1
1	cod	43	1
1	cod	45	1
1	tc		21
1	sculpin		1
1	rock		1
2	cod	53	1
2	cod	51	1
2	cod	52	1
2	cod	52	1
2	cod	51	1
2	cod	68	1
2	cod	66	1
2	cod	80	1
2	cod	51	1
2	cod	52	1
2	cod	48	1
2	cod	50	1
2	cod	57	1
2	cod	58	1
2	cod	55	1
2	cod	60	1
2	cod	64	1
2	cod	63	1
2	cod	62	1
2	cod	56	1
2	cod	58	1
2	cod	48	1
2	cod	50	1
2	cod	55	1
2	tc		64
3	cod	64	1
3	cod	56	1
3	cod	67	1
3	cod	54	1
3	cod	61	1
3	cod	61	1
3	cod	63	1
3	cod	55	1
3	cod	59	1
3	cod	64	1
3	cod	56	1
3	cod	66	1
3	cod	59	1
3	cod	51	1
3	tc		21
3	sculpin		1
3	rock		1
4	cod	49	1
4	cod	59	1
4	cod	72	1
4	cod	50	1
4	cod	56	1
4	cod	53	1
4	cod	67	1
4	tc		4
5	tc		15	BAIT BAG FAIL
5	cod	60	1	BAIT BAG FAIL
5	cod	46	1	BAIT BAG FAIL
5	cod	56	1	BAIT BAG FAIL
5	cod	57	1	BAIT BAG FAIL
5	cod	81	1	BAIT BAG FAIL
6	cod	42	1
6	cod	47	1
6	cod	74	1
6	cod	69	1
6	cod	58	1
6	cod	58	1
6	cod	61	1
6	cod	66	1
6	cod	46	1
6	cod	50	1
6	cod	60	1
6	cod	66	1
6	cod	59	1
6	cod	68	1
6	cod	58	1
6	cod	69	1
6	cod	77	1
6	cod	55	1
6	cod	60	1
6	cod	63	1
6	cod	79	1
6	cod	45	1
6	cod	61	1
6	cod	60	1
6	cod	57	1
6	cod	35	1
6	cod	59	1
6	cod	49	1
6	tc		44
7	cod	56	1
7	cod	58	1
7	cod	71	1
7	cod	74	1
7	cod	65	1
7	cod	57	1
7	cod	61	1
7	cod	58	1
7	cod	77	1
7	cod	56	1
7	cod	59	1
7	cod	60	1
7	cod	64	1
7	cod	55	1
7	cod	69	1
7	cod	63	1
7	cod	60	1
7	cod	54	1
7	cod	50	1
7	cod	54	1
7	cod	63	1
7	tc		51
7	sculpin		1
8	cod	70	1
8	cod	49	1
8	cod	55	1
8	cod	70	1
8	cod	66	1
8	cod	62	1
8	cod	54	1
8	cod	81	1
8	cod	59	1
8	cod	51	1
8	cod	46	1
8	cod	93	1
8	tc		35
9	cod	64	1
9	cod	70	1
9	cod	67	1
9	cod	68	1
9	cod	67	1
9	cod	72	1
9	cod	62	1
9	cod	52	1
9	cod	58	1
9	cod	61	1
9	cod	60	1
9	sculpin		4
9	tc		11
10	cod	53	1
10	cod	53	1
10	cod	59	1
10	cod	69	1
10	cod	74	1
10	cod	77	1
10	cod	70	1
10	cod	70	1
10	cod	68	1
10	cod	64	1
10	cod	72	1
10	cod	66	1
10	cod	48	1
10	cod	66	1
10	cod	64	1
10	cod	88	1
10	cod	55	1
10	cod	54	1
10	cod	73	1
10	cod	60	1
10	cod	51	1
10	cod	51	1
10	cod	50	1
10	cod	50	1
10	cod	59	1
10	cod	65	1
10	cod	62	1
10	cod	62	1
10	cod	64	1
10	cod	67	1
10	cod	58	1
10	cod	48	1
10	cod	58	1
10	cod	70	1
10	cod	63	1
10	tc		40
11	cod	59	1
11	cod	49	1
11	cod	54	1
11	cod	66	1
11	cod	67	1
11	cod	71	1
11	cod	70	1
11	cod	55	1
11	cod	59	1
11	cod	52	1
11	cod	57	1
11	cod	47	1
11	cod	63	1
11	cod	54	1
11	cod	51	1
11	cod	47	1
11	cod	65	1
11	cod	54	1
11	cod	56	1
11	sculpin		3
11	rock		2
11	tc		26
12	cod	78	1
12	cod	59	1
12	cod	60	1
12	cod	69	1
12	cod	59	1
12	cod	54	1
12	cod	55	1
12	cod	53	1
12	cod	66	1
12	cod	77	1
12	cod	63	1
12	cod	57	1
12	cod	52	1
12	cod	50	1
12	cod	64	1
12	cod	69	1
12	cod	49	1
12	cod	50	1
12	cod	58	1
12	cod	56	1
12	cod	57	1
12	cod	51	1
12	cod	56	1
12	cod	50	1
12	cod	55	1
12	cod	53	1
12	cod	56	1
12	cod	63	1
12	cod	53	1
12	cod	53	1
12	cod	62	1
12	cod	58	1
12	cod	57	1
12	cod	65	1
12	cod	60	1
12	tc		47
12	sculpin		1
13	cod	77	1
13	cod	57	1
13	cod	54	1
13	cod	66	1
13	cod	56	1
13	cod	71	1
13	cod	70	1
13	cod	54	1
13	cod	58	1
13	cod	57	1
13	cod	68	1
13	cod	57	1
13	cod	46	1
13	cod	44	1
13	cod	52	1
13	cod	69	1
13	cod	49	1
13	cod	64	1
13	cod	62	1
13	tc		26
14	cod	42	1
14	cod	58	1
14	cod	54	1
14	cod	56	1
14	cod	48	1
14	cod	54	1
14	cod	51	1
14	cod	58	1
14	cod	81	1
14	cod	93	1
14	cod	57	1
14	cod	50	1
14	cod	63	1
14	cod	55	1
14	cod	67	1
14	cod	59	1
14	cod	56	1
14	cod	58	1
14	cod	70	1
14	cod	53	1
14	cod	64	1
14	cod	58	1
14	cod	48	1
14	cod	57	1
14	cod	62	1
14	cod	47	1
14	cod	53	1
14	tc		4
15	cod	43	1
15	cod	48	1
15	cod	47	1
15	cod	49	1
15	cod	46	1
15	cod	50	1
15	cod	50	1
15	cod	54	1
15	cod	79	1
15	cod	72	1
15	cod	53	1
15	cod	59	1
15	cod	56	1
15	cod	58	1
15	cod	53	1
15	cod	62	1
15	cod	60	1
15	cod	49	1
15	cod	53	1
15	cod	50	1
15	cod	55	1
15	cod	62	1
15	cod	58	1
15	cod	52	1
15	cod	48	1
15	cod	53	1
15	cod	50	1
15	cod	61	1
15	cod	58	1
15	cod	64	1
15	cod	65	1
15	cod	50	1
15	cod	49	1
15	cod	54	1
15	cod	48	1
15	cod	63	1
15	cod	74	1
15	cod	52	1
15	cod	50	1
15	cod	57	1
15	cod	63	1
15	cod	50	1
15	cod	48	1
15	cod	80	1
15	cod	54	1
15	cod	72	1
15	cod	60	1
15	cod	59	1
15	cod	64	1
15	cod	69	1
15	cod	53	1
15	cod	57	1
15	cod	66	1
15	cod	60	1
15	cod	55	1
15	cod	50	1
15	cod	55	1
15	cod	54	1
15	cod	80	1
15	cod	64	1
15	cod	54	1
15	cod	51	1
15	cod	55	1
15	cod	54	1
15	tc		4
15	rock		2
16	cod	51	1
16	cod	51	1
16	cod	59	1
16	cod	53	1
16	cod	57	1
16	cod	57	1
16	cod	49	1
16	tc		33
16	sculpin		1
16	urchin		2
17	cod	82	1
17	cod	57	1
17	cod	81	1
17	cod	53	1
17	cod	52	1
17	cod	56	1
17	cod	64	1
17	cod	71	1
17	cod	71	1
17	cod	49	1
17	cod	60	1
17	cod	54	1
17	cod	71	1
17	cod	53	1
17	cod	55	1
17	cod	64	1
17	tc		32
17	rock		1
18	cod	54	1
18	cod	49	1
18	cod	48	1
18	cod	54	1
18	cod	51	1
18	cod	75	1
18	sculpin		3
18	whelk		1
18	tc		72
19	cod	44	1
19	cod	46	1
19	cod	47	1
19	cod	47	1
19	cod	65	1
19	cod	47	1
19	cod	43	1
19	cod	64	1
19	cod	58	1
19	cod	55	1
19	cod	41	1
19	cod	52	1
19	cod	56	1
19	cod	52	1
19	cod	58	1
19	cod	57	1
19	cod	47	1
19	cod	50	1
19	cod	59	1
19	cod	59	1
19	cod	52	1
19	cod	51	1
19	cod	54	1
19	cod	43	1
19	cod	70	1
19	cod	68	1
19	cod	49	1
19	cod	47	1
19	cod	49	1
19	cod	55	1
19	cod	48	1
19	cod	50	1
19	cod	58	1
19	cod	47	1
19	cod	42	1
19	tc		1
20	cod	47	1
20	cod	42	1
20	cod	47	1
20	cod	45	1
20	cod	52	1
20	cod	46	1
20	cod	90	1
20	tc		1
21	cod	47	1
21	cod	74	1
21	cod	71	1
21	cod	63	1
21	cod	54	1
21	cod	49	1
21	cod	52	1
21	cod	55	1
21	cod	53	1
21	cod	50	1
21	cod	60	1
21	cod	54	1
21	cod	55	1
21	cod	60	1
21	cod	60	1
21	cod	67	1
21	cod	57	1
21	cod	72	1
21	cod	63	1
21	tc		37
22	cod	36	1
22	cod	46	1
22	cod	64	1
22	cod	67	1
22	cod	68	1
22	cod	61	1
22	cod	62	1
22	cod	67	1
22	cod	59	1
22	cod	46	1
22	cod	65	1
22	tc		13
23	cod	53	1
23	cod	51	1
23	cod	49	1
23	cod	53	1
23	cod	54	1
23	cod	53	1
23	cod	66	1
23	cod	79	1
23	cod	54	1
23	cod	65	1
23	cod	82	1
23	cod	67	1
23	cod	44	1
23	cod	67	1
23	cod	53	1
23	cod	75	1
23	cod	60	1
23	cod	86	1
23	cod	57	1
23	cod	67	1
23	cod	63	1
23	cod	52	1
23	cod	58	1
23	cod	59	1
23	cod	73	1
23	cod	71	1
23	cod	50	1
23	cod	57	1
23	cod	52	1
23	cod	59	1
23	cod	78	1
23	cod	64	1
23	tc		54
24	cod	89	1
24	cod	63	1
24	cod	76	1
24	cod	56	1
24	cod	59	1
24	cod	58	1
24	cod	48	1
24	cod	54	1
24	cod	58	1
24	cod	60	1
24	sculpin		1
24	tc		2
25	cod	88	1
25	cod	77	1
25	cod	67	1
25	cod	54	1
25	cod	74	1
25	cod	77	1
25	cod	74	1
25	cod	54	1
25	cod	74	1
25	cod	65	1
25	cod	64	1
25	cod	46	1
25	cod	49	1
25	cod	49	1
25	cod	50	1
25	tc		34
25	sculpin		1
26	cod	67	1
26	cod	80	1
26	cod	64	1
26	cod	73	1
26	cod	57	1
26	cod	60	1
26	cod	53	1
26	cod	54	1
26	cod	55	1
26	cod	61	1
26	cod	60	1
26	cod	63	1
26	cod	80	1
26	cod	73	1
26	cod	73	1
26	cod	81	1
26	cod	81	1
26	cod	70	1
26	cod	58	1
26	cod	48	1
26	cod	60	1
26	cod	73	1
26	cod	59	1
26	cod	50	1
26	cod	48	1
26	cod	46	1
26	cod	57	1
26	cod	73	1
26	cod	82	1
26	cod	70	1
26	cod	74	1
26	cod	71	1
26	cod	70	1
26	cod	70	1
26	cod	74	1
26	cod	62	1
26	cod	72	1
26	tc		22
27	cod	64	1
27	cod	67	1
27	cod	63	1
27	cod	62	1
27	cod	50	1
27	cod	67	1
27	cod	83	1
27	cod	67	1
27	cod	60	1
27	cod	63	1
27	cod	66	1
27	cod	79	1
27	cod	77	1
27	cod	61	1
27	cod	74	1
27	cod	48	1
27	tc		21
28	cod	53	1
28	cod	45	1
28	cod	53	1
28	cod	54	1
28	cod	74	1
28	cod	85	1
28	cod	59	1
28	cod	52	1
28	cod	61	1
28	cod	61	1
28	cod	56	1
28	cod	66	1
28	cod	75	1
28	cod	57	1
28	cod	53	1
28	cod	57	1
28	cod	59	1
28	cod	67	1
28	cod	71	1
28	cod	63	1
28	cod	65	1
28	cod	70	1
28	cod	66	1
28	cod	62	1
28	cod	66	1
28	cod	72	1
28	tc		33
29	cod	72	1
29	cod	55	1
29	cod	80	1
29	cod	66	1
29	cod	88	1
29	cod	80	1
29	cod	86	1
29	cod	58	1
29	cod	48	1
29	cod	69	1
29	cod	65	1
29	cod	49	1
29	cod	83	1
29	tc		5
29	sculpin		1
30	cod	68	1
30	cod	73	1
30	cod	76	1
30	cod	56	1
30	cod	61	1
30	cod	79	1
30	cod	62	1
30	cod	79	1
30	cod	72	1
30	cod	88	1
30	cod	67	1
30	cod	67	1
30	cod	61	1
30	cod	58	1
30	cod	66	1
30	cod	58	1
30	cod	55	1
30	cod	80	1
30	cod	67	1
30	cod	74	1
30	cod	55	1
30	cod	47	1
30	cod	68	1
30	cod	56	1
30	cod	53	1
30	cod	42	1
30	cod	58	1
30	cod	57	1
30	cod	51	1
30	cod	63	1
30	cod	58	1
30	cod	67	1
30	cod	72	1
30	cod	49	1
30	tc		27
31	cod	64	1
31	cod	89	1
31	cod	51	1
31	cod	60	1
31	cod	59	1
31	cod	72	1
31	cod	65	1
31	cod	53	1
31	cod	64	1
31	cod	51	1
31	cod	50	1
31	cod	76	1
31	cod	51	1
31	tc		34
31	rock		1
32	cod	50	1
32	cod	53	1
32	cod	51	1
32	cod	66	1
32	cod	58	1
32	cod	64	1
32	cod	64	1
32	cod	52	1
32	cod	52	1
32	cod	80	1
32	cod	55	1
32	cod	49	1
32	cod	81	1
32	cod	82	1
32	cod	49	1
32	cod	48	1
32	cod	46	1
32	cod	57	1
32	cod	53	1
32	cod	67	1
32	cod	59	1
32	cod	73	1
32	cod	66	1
32	cod	84	1
32	cod	68	1
32	cod	48	1
32	cod	64	1
32	cod	78	1
32	cod	73	1
32	cod	84	1
32	cod	53	1
32	cod	72	1
32	cod	53	1
32	cod	79	1
32	rock		1
32	sculpin		1
32	tc		43
33	cod	64	1
33	cod	65	1
33	cod	61	1
33	cod	83	1
33	cod	54	1
33	cod	79	1
	tc		14
34	cod	102	1
34	cod	58	1
34	cod	83	1
34	cod	89	1
34	cod	54	1
34	cod	58	1
34	cod	65	1
34	cod	72	1
34	cod	63	1
34	cod	61	1
	sculpin		1
	tc		2
35	cod	66	1
35	cod	74	1
35	cod	90	1
35	cod	46	1
35	cod	82	1
35	cod	67	1
35	cod	61	1
35	cod	47	1
35	cod	59	1
35	cod	46	1
35	cod	62	1
35	cod	51	1
35	cod	59	1
35	cod	54	1
35	cod	73	1
35	cod	58	1
35	cod	48	1
35	cod	55	1
35	cod	59	1
35	cod	86	1
35	cod	45	1
35	cod	53	1
35	cod	71	1
35	cod	66	1
35	cod	53	1
35	cod	79	1
35	cod	61	1
35	cod	66	1
35	cod	65	1
35	cod	66	1
35	cod	64	1
35	cod	67	1
35	cod	70	1
35	cod	58	1
35	cod	75	1
35	tc		19
36	cod	56	1
36	cod	69	1
36	cod	54	1
36	cod	57	1
36	cod	66	1
36	cod	62	1
36	cod	58	1
36	cod	72	1
36	cod	53	1
36	cod	53	1
36	cod	53	1
36	cod	58	1
36	cod	61	1
36	cod	48	1
36	cod	57	1
36	cod	51	1
36	cod	50	1
36	cod	52	1
36	cod	52	1
36	cod	53	1
36	cod	56	1
36	cod	56	1
36	cod	63	1
36	cod	59	1
36	cod	55	1
36	cod	54	1
36	cod	58	1
36	cod	61	1
36	cod	56	1
36	cod	73	1
36	tc		67
36	rock		2
36	sculpin		2
37	cod	68	1
37	cod	63	1
37	cod	60	1
37	cod	80	1
37	cod	55	1
37	cod	52	1
37	cod	58	1
37	cod	51	1
37	cod	53	1
37	cod	54	1
37	cod	58	1
37	cod	71	1
37	cod	60	1
37	cod	71	1
37	cod	50	1
37	cod	51	1
37	cod	52	1
37	cod	64	1
37	cod	69	1
37	cod	74	1
37	cod	69	1
37	cod	67	1
37	cod	62	1
37	cod	60	1
37	cod	48	1
37	cod	54	1
37	cod	56	1
37	cod	62	1
37	cod	66	1
37	cod	64	1
37	cod	63	1
37	cod	61	1
37	cod	51	1
37	cod	56	1
37	cod	55	1
37	tc		55
38	cod	35	1
38	cod	63	1
38	cod	51	1
38	cod	48	1
38	cod	64	1
38	cod	49	1
38	cod	66	1
38	cod	46	1
38	cod	40	1
38	cod	48	1
38	cod	47	1
38	cod	54	1
38	cod	52	1
38	cod	47	1
38	cod	55	1
38	cod	60	1
38	cod	59	1
38	cod	63	1
38	rock		1
39	cod	77	1
39	cod	61	1
39	cod	74	1
39	cod	62	1
39	cod	50	1
39	cod	67	1
39	cod	51	1
39	cod	49	1
39	cod	53	1
39	cod	56	1
39	cod	50	1
39	cod	51	1
39	cod	66	1
39	cod	62	1
39	cod	62	1
40	cod	54	1
40	cod	52	1
40	cod	54	1
40	cod	82	1
40	cod	64	1
40	cod	63	1
40	cod	57	1
40	cod	60	1
40	cod	61	1
40	cod	66	1
40	cod	55	1
40	cod	52	1
40	cod	74	1
40	cod	58	1
40	cod	64	1
40	cod	50	1
40	cod	45	1
40	cod	58	1
40	cod	57	1
40	cod	57	1
40	cod	59	1
40	cod	50	1
40	cod	78	1
40	cod	62	1
40	cod	60	1
40	cod	59	1
40	cod	57	1
40	cod	49	1
40	cod	56	1
40	cod	67	1
40	cod	47	1
40	cod	59	1
40	cod	62	1
40	cod	64	1
40	cod	49	1
40	cod	69	1
40	cod	56	1
40	cod	58	1
40	rock		2
40	sculpin		1
40	tc		12
41	cod	56	1
41	cod	68	1
41	cod	61	1
41	cod	60	1
41	cod	69	1
41	cod	62	1
41	cod	52	1
41	cod	62	1
41	cod	59	1
41	cod	78	1
41	cod	92	1
41	cod	80	1
41	cod	69	1
41	cod	70	1
41	cod	71	1
41	cod	70	1
41	tc		45
41	sculpin		2
42	cod	50	1
42	cod	56	1
42	cod	66	1
42	cod	60	1
42	cod	71	1
42	cod	66	1
42	cod	57	1
42	cod	63	1
42	cod	60	1
42	cod	49	1
42	cod	59	1
42	cod	53	1
42	cod	67	1
42	cod	57	1
42	cod	63	1
42	cod	51	1
42	cod	77	1
42	cod	69	1
42	cod	57	1
42	cod	60	1
42	cod	65	1
42	cod	68	1
42	cod	77	1
42	tc		35
42	sculpin		1
43	cod	67	1
43	cod	58	1
43	cod	52	1
43	cod	76	1
43	cod	57	1
43	cod	64	1
43	cod	60	1
43	cod	58	1
43	cod	57	1
43	cod	76	1
43	cod	70	1
43	cod	61	1
43	cod	73	1
43	cod	64	1
43	cod	61	1
43	cod	83	1
43	cod	85	1
43	cod	59	1
43	cod	60	1
43	cod	99	1
43	cod	77	1
43	tc		44
44	cod	64	1
44	cod	50	1
44	cod	63	1
44	cod	64	1
44	cod	63	1
44	cod	56	1
44	cod	59	1
44	cod	66	1
44	cod	77	1
44	cod	76	1
44	tc		2
45	cod	47	1
45	cod	57	1
45	cod	51	1
45	cod	88	1
45	cod	47	1
45	cod	63	1
45	cod	66	1
45	cod	59	1
45	cod	67	1
45	cod	75	1
45	cod	61	1
45	cod	66	1
45	cod	50	1
45	cod	64	1
45	cod	64	1
45	cod	77	1
45	cod	50	1
45	cod	67	1
45	cod	60	1
45	cod	56	1
45	cod	56	1
45	cod	71	1
45	cod	66	1
45	cod	67	1
45	cod	73	1
45	cod	58	1
45	tc		2
46	cod	50	1
46	cod	48	1
46	cod	57	1
46	cod	58	1
46	cod	76	1
46	cod	50	1
46	cod	68	1
46	cod	52	1
46	cod	62	1
46	cod	51	1
46	cod	67	1
46	cod	55	1
46	cod	80	1
46	cod	61	1
46	cod	50	1
46	cod	50	1
46	tc		17
47	cod	47	1
47	cod	62	1
47	cod	77	1
47	cod	55	1
47	cod	55	1
47	cod	47	1
47	cod	76	1
47	cod	63	1
47	cod	69	1
47	cod	66	1
47	cod	46	1
47	cod	46	1
47	cod	63	1
47	cod	60	1
47	tc		19
48	cod	49	1
48	cod	67	1
48	cod	74	1
48	cod	56	1
48	cod	53	1
48	cod	62	1
48	cod	50	1
48	cod	71	1
48	cod	66	1
48	cod	76	1
48	cod	64	1
48	tc		24
49	cod	39	1
49	cod	67	1
49	cod	57	1
49	cod	66	1
49	cod	54	1
49	cod	53	1
49	rock		1
50	cod	47	1
50	cod	55	1
50	cod	63	1
50	cod	64	1
50	cod	73	1
50	cod	50	1
50	cod	86	1
50	cod	64	1
50	cod	63	1
50	cod	69	1
50	cod	65	1
50	cod	60	1
50	cod	55	1
50	cod	54	1
50	cod	67	1
50	cod	74	1
50	cod	51	1
50	cod	54	1
50	cod	61	1
50	cod	53	1
50	cod	61	1
50	cod	78	1
50	cod	60	1
50	cod	50	1
50	cod	75	1
50	cod	60	1
50	cod	70	1
50	cod	57	1
50	cod	61	1
50	cod	75	1
50	cod	49	1
50	cod	63	1
50	cod	60	1
50	cod	70	1
50	cod	58	1
50	cod	66	1
50	cod	51	1
50	cod	54	1
50	cod	52	1
50	cod	57	1
50	cod	59	1
50	cod	83	1
50	cod	73	1
50	cod	62	1
50	cod	73	1
50	cod	65	1
50	cod	75	1
50	tc		10
51	cod	58	1
51	cod	53	1
51	cod	64	1
51	cod	54	1
51	cod	57	1
51	cod	52	1
51	cod	73	1
51	cod	66	1
51	cod	68	1
51	cod	70	1
51	cod	61	1
51	cod	58	1
51	cod	56	1
51	cod	67	1
51	cod	73	1
51	cod	63	1
51	cod	57	1
51	cod	60	1
51	cod	52	1
51	cod	71	1
51	cod	61	1
51	cod	58	1
51	cod	47	1
51	cod	55	1
51	cod	57	1
51	cod	49	1
51	sculpin		1
51	tc		43
52	cod	66	1
52	cod	55	1
52	cod	58	1
52	cod	66	1
52	cod	49	1
52	cod	47	1
52	cod	59	1
52	cod	56	1
52	cod	54	1
52	cod	53	1
52	cod	56	1
52	cod	54	1
52	cod	59	1
52	cod	78	1
52	cod	55	1
52	cod	62	1
52	cod	68	1
52	cod	56	1
52	cod	58	1
52	cod	61	1
52	cod	66	1
52	cod	50	1
52	cod	70	1
52	cod	64	1
52	cod	61	1
52	cod	46	1
52	cod	62	1
52	cod	58	1
52	cod	61	1
52	cod	51	1
52	cod	61	1
52	cod	67	1
52	cod	54	1
52	cod	56	1
52	sculpin		2
52	tc		66
53	cod	45	1
53	cod	50	1
53	cod	62	1
53	cod	54	1
53	cod	70	1
53	cod	58	1
53	cod	58	1
53	cod	53	1
53	cod	54	1
53	cod	60	1
53	cod	56	1
53	cod	54	1
53	cod	51	1
53	cod	66	1
53	tc		19
53	sculpin		1
54	cod	52	1
54	cod	54	1
54	cod	53	1
54	cod	55	1
54	tc		1
54	sculpin		1
55	cod	62	1
55	cod	48	1
55	cod	49	1
55	cod	49	1
55	cod	47	1
55	cod	49	1
55	cod	49	1
55	cod	59	1
55	cod	55	1
55	cod	58	1
55	cod	50	1
55	cod	60	1
55	cod	72	1
55	cod	50	1
55	cod	48	1
55	cod	53	1
55	cod	54	1
55	cod	60	1
55	cod	72	1
55	cod	62	1
55	cod	54	1
55	cod	68	1
55	cod	60	1
55	cod	63	1
55	cod	46	1
55	cod	44	1
55	cod	48	1
55	cod	62	1
55	cod	53	1
55	cod	50	1
55	cod	62	1
55	cod	85	1
55	cod	50	1
55	cod	66	1
55	cod	70	1
55	cod	53	1
55	cod	55	1
55	cod	55	1
55	cod	64	1
55	cod	52	1
55	cod	53	1
55	cod	88	1
55	cod	50	1
55	cod	80	1
55	cod	54	1
55	cod	49	1
55	cod	52	1
55	cod	56	1
55	cod	54	1
55	cod	62	1
55	cod	57	1
55	cod	66	1
55	cod	50	1
55	cod	52	1
55	cod	50	1
55	cod	58	1
55	cod	62	1
55	cod	63	1
55	cod	50	1
55	cod	65	1
55	cod	60	1
55	cod	70	1
55	cod	65	1
55	cod	76	1
55	rock		3
55	sculpin		2
55	tc		34
56	cod	29	1
56	cod	31	1
56	cod	49	1
56	cod	48	1
56	cod	36	1
56	cod	76	1
56	cod	75	1
56	cod	67	1
56	cod	56	1
56	cod	37	1
56	cod	78	1
56	cod	65	1
56	cod	76	1
56	cod	65	1
56	cod	57	1
56	cod	76	1
56	cod	66	1
56	cod	62	1
56	cod	60	1
56	cod	80	1
56	cod	66	1
56	cod	69	1
56	cod	62	1
56	cod	61	1
56	cod	70	1
56	cod	61	1
56	cod	75	1
56	cod	62	1
56	cod	55	1
56	cod	79	1
56	tc		25
57	cod	55	1
57	cod	58	1
57	cod	64	1
57	cod	76	1
57	cod	71	1
57	cod	59	1
57	cod	64	1
57	cod	71	1
57	cod	63	1
57	cod	57	1
57	cod	68	1
57	tc		54
58	cod	80	1
58	cod	61	1
58	cod	84	1
58	cod	58	1
58	cod	74	1
58	cod	73	1
58	cod	78	1
58	cod	91	1
58	cod	87	1
58	cod	70	1
58	cod	52	1
58	cod	80	1
58	sculpin		1
58	tc		44
59	cod	65	1
59	cod	54	1
59	tc		4
59	sculpin		1
60	cod	57	1
60	cod	68	1
60	cod	88	1
60	cod	52	1
60	cod	91	1
60	cod	88	1
60	cod	81	1
60	cod	70	1
60	cod	71	1
60	cod	80	1
60	cod	75	1
60	cod	60	1
60	cod	69	1
60	cod	62	1
60	cod	61	1
60	cod	52	1
60	cod	64	1
60	cod	67	1
60	cod	65	1
60	cod	72	1
60	cod	71	1
60	cod	64	1
60	cod	70	1
60	cod	64	1
60	cod	49	1
60	cod	59	1
60	cod	62	1
60	cod	62	1
60	cod	66	1
60	cod	65	1
60	cod	56	1
60	cod	49	1
60	cod	80	1
60	cod	50	1
60	cod	67	1
60	cod	71	1
60	cod	59	1
60	cod	75	1
60	cod	64	1
60	cod	60	1
60	cod	79	1
60	cod	65	1
60	cod	76	1
60	tc		57
61	cod	55	1
61	cod	57	1
61	cod	70	1
61	cod	50	1
61	cod	57	1
61	cod	57	1
61	cod	76	1
61	cod	55	1
61	cod	76	1
61	cod	61	1
61	cod	72	1
61	cod	73	1
61	cod	57	1
61	cod	72	1
61	cod	68	1
61	cod	62	1
61	cod	76	1
61	cod	55	1
61	cod	88	1
61	cod	79	1
61	sculpin		1
61	tc		12
62	cod	55	1
62	cod	56	1
62	cod	55	1
62	cod	77	1
62	cod	67	1
62	cod	72	1
62	cod	88	1
62	sculpin		1
62	tc		12
63	cod	59	1
63	cod	67	1
63	cod	75	1
63	cod	88	1
63	cod	83	1
63	tc		7
64	cod	53	1
64	cod	60	1
64	cod	62	1
64	cod	66	1
64	cod	59	1
64	cod	62	1
64	cod	67	1
64	cod	58	1
64	cod	64	1
64	cod	70	1
64	cod	57	1
64	cod	65	1
64	cod	73	1
64	cod	63	1
64	cod	75	1
64	cod	52	1
64	cod	75	1
64	cod	61	1
64	cod	55	1
64	cod	62	1
64	cod	60	1
64	cod	78	1
64	cod	71	1
65	cod	69	1
65	cod	48	1
65	cod	50	1
65	cod	49	1
65	cod	54	1
65	cod	48	1
65	cod	47	1
65	cod	51	1
65	cod	67	1
65	cod	49	1
65	cod	62	1
65	cod	61	1
65	cod	60	1
65	cod	65	1
65	cod	62	1
65	cod	73	1
65	cod	71	1
65	cod	56	1
65	cod	64	1
65	cod	64	1
65	cod	68	1
65	cod	58	1
65	cod	67	1
65	cod	68	1
65	rock		1
65	tc		3
81	cod	47	1
81	cod	41	1
81	cod	59	1
81	cod	58	1
81	cod	74	1
81	cod	63	1
81	cod	57	1
81	cod	53	1
81	cod	70	1
81	cod	51	1
81	eel		1
81	sculpin		1
81	tc		34
82	cod	63	1
82	cod	71	1
82	cod	55	1
82	cod	54	1
82	cod	79	1
82	cod	58	1
82	cod	71	1
82	cod	68	1
82	cod	69	1
82	cod	68	1
82	cod	54	1
82	cod	48	1
82	cod	78	1
82	cod	62	1
82	cod	73	1
82	cod	56	1
82	cod	59	1
82	cod	58	1
82	cod	66	1
82	tc		33
82	sculpin		1
82	eel		2
83	cod	51	1
83	cod	51	1
83	cod	54	1
83	cod	57	1
83	cod	81	1
83	cod	54	1
83	cod	52	1
83	cod	64	1
83	cod	74	1
83	cod	61	1
83	cod	55	1
83	cod	66	1
83	cod	64	1
83	cod	60	1
83	cod	50	1
83	cod	66	1
83	cod	65	1
83	cod	63	1
83	cod	65	1
83	cod	59	1
83	tc		105
84	cod	47	1
84	cod	45	1
84	cod	62	1
84	cod	61	1
84	cod	53	1
84	cod	63	1
84	cod	67	1
84	cod	83	1
84	tc		1
85	cod	46	1
85	cod	63	1
85	cod	62	1
85	cod	63	1
85	cod	48	1
85	cod	60	1
85	cod	47	1
85	cod	69	1
85	cod	54	1
85	cod	64	1
85	cod	59	1
85	cod	63	1
85	cod	48	1
85	cod	65	1
85	cod	60	1
85	cod	68	1
85	cod	51	1
85	cod	73	1
85	cod	51	1
85	cod	50	1
85	cod	95	1
85	cod	89	1
85	cod	56	1
85	cod	52	1
85	cod	51	1
85	cod	71	1
85	cod	66	1
85	cod	73	1
85	cod	66	1
85	cod	60	1
85	cod	71	1
85	cod	62	1
85	cod	84	1
85	tc		16
86	cod	53	1
86	cod	50	1
86	cod	59	1
86	cod	61	1
86	cod	76	1
86	cod	78	1
86	cod	57	1
86	cod	92	1
86	cod	64	1
86	cod	74	1
86	cod	63	1
86	cod	72	1
86	cod	63	1
86	tc		17
87	cod	72	1
87	cod	80	1
87	cod	74	1
87	cod	69	1
87	cod	53	1
87	cod	60	1
87	cod	51	1
87	tc		11
88	cod	68	1
88	cod	57	1
88	cod	60	1
88	cod	67	1
88	cod	85	1
88	cod	52	1
88	cod	60	1
88	cod	61	1
88	cod	66	1
88	cod	64	1
88	cod	58	1
88	cod	52	1
88	cod	50	1
88	cod	62	1
88	cod	54	1
88	cod	54	1
88	cod	61	1
88	cod	62	1
88	cod	51	1
88	cod	55	1
88	cod	59	1
88	cod	69	1
88	cod	67	1
88	sculpin		1
88	tc		35
89	cod	66	1
89	sculpin		2
90	cod	77	1
90	cod	68	1
90	cod	63	1
90	cod	51	1
90	cod	69	1
90	cod	71	1
90	cod	56	1
90	cod	57	1
90	cod	70	1
90	cod	79	1
90	cod	49	1
90	cod	54	1
90	cod	51	1
90	cod	61	1
90	cod	73	1
90	cod	52	1
90	cod	61	1
90	cod	66	1
90	cod	67	1
90	cod	72	1
90	cod	71	1
90	cod	76	1
90	cod	69	1
90	cod	75	1
90	cod	94	1
90	cod	72	1
90	cod	78	1
90	cod	76	1
90	cod	64	1
90	cod	83	1
90	cod	82	1
90	cod	70	1
90	cod	67	1
90	cod	77	1
90	cod	57	1
90	tc		24
66	cod	49	1
66	cod	48	1
66	cod	46	1
66	cod	39	1
66	cod	42	1
66	cod	72	1
66	cod	75	1
66	cod	63	1
66	cod	60	1
66	cod	50	1
66	cod	71	1
66	cod	59	1
66	cod	62	1
66	cod	63	1
66	cod	68	1
66	cod	83	1
66	cod	88	1
66	cod	72	1
66	cod	63	1
66	cod	72	1
66	cod	59	1
66	cod	84	1
66	cod	91	1
66	cod	57	1
66	tc		49
67	cod	61	1
67	cod	56	1
67	cod	71	1
67	cod	76	1
67	cod	69	1
67	cod	76	1
67	cod	62	1
67	cod	65	1
67	cod	67	1
67	cod	91	1
67	cod	66	1
67	cod	67	1
67	cod	60	1
67	cod	73	1
67	cod	79	1
67	cod	59	1
67	cod	67	1
67	cod	64	1
67	cod	78	1
67	cod	55	1
67	cod	55	1
67	cod	56	1
67	cod	72	1
67	cod	56	1
67	cod	52	1
67	cod	55	1
67	cod	68	1
67	cod	68	1
67	cod	64	1
67	cod	69	1
67	cod	68	1
67	cod	93	1
67	cod	80	1
67	cod	52	1
67	cod	85	1
67	cod	82	1
67	cod	61	1
67	cod	63	1
67	cod	53	1
67	cod	51	1
67	cod	72	1
67	cod	78	1
67	cod	81	1
67	cod	59	1
67	cod	72	1
67	cod	65	1
67	cod	75	1
67	cod	51	1
67	cod	61	1
67	cod	53	1
67	cod	66	1
67	cod	82	1
67	cod	60	1
67	cod	74	1
67	cod	88	1
67	sculpin		2
67	tc		30
68	cod	61	1
68	cod	91	1
68	cod	66	1
68	tc		4
69	cod	63	1
69	cod	57	1
69	cod	82	1
69	cod	56	1
69	cod	50	1
69	cod	50	1
69	cod	61	1
69	cod	52	1
69	cod	90	1
69	cod	59	1
69	cod	73	1
69	cod	74	1
69	cod	70	1
69	cod	60	1
69	cod	91	1
69	cod	81	1
69	cod	63	1
69	cod	62	1
69	cod	79	1
69	cod	61	1
69	cod	65	1
69	cod	63	1
69	cod	66	1
69	cod	70	1
69	cod	59	1
69	cod	66	1
69	cod	66	1
69	cod	61	1
69	cod	64	1
70	cod	57	1
70	cod	69	1
70	cod	63	1
70	cod	77	1
70	cod	69	1
70	cod	60	1
70	cod	77	1
70	cod	73	1
70	cod	66	1
70	cod	63	1
70	cod	75	1
70	cod	77	1
70	cod	47	1
70	cod	63	1
70	cod	85	1
70	cod	61	1
70	seal		1
70	tc		36
70	sculpin		3
71	cod	44	1
71	cod	55	1
71	cod	70	1
71	cod	77	1
71	cod	61	1
71	cod	73	1
71	cod	66	1
71	cod	62	1
71	cod	59	1
71	cod	55	1
71	cod	73	1
71	cod	66	1
71	cod	68	1
71	cod	66	1
71	cod	73	1
71	cod	56	1
71	sculpin		1
71	tc		34
72	cod	68	1
72	cod	50	1
72	cod	59	1
72	cod	69	1
72	cod	60	1
72	cod	68	1
72	cod	97	1
72	cod	70	1
72	cod	68	1
72	cod	66	1
72	cod	71	1
72	cod	62	1
72	cod	72	1
72	cod	76	1
72	cod	65	1
72	cod	55	1
72	cod	78	1
72	cod	66	1
72	cod	61	1
72	cod	65	1
72	cod	77	1
72	cod	87	1
72	cod	72	1
72	cod	81	1
72	cod	67	1
72	cod	63	1
72	cod	79	1
72	cod	59	1
72	cod	60	1
72	cod	72	1
72	cod	69	1
72	cod	71	1
72	cod	61	1
72	cod	60	1
72	cod	66	1
72	cod	77	1
72	cod	66	1
72	cod	72	1
72	cod	63	1
72	cod	59	1
72	cod	67	1
72	cod	77	1
72	cod	80	1
72	cod	71	1
72	cod	55	1
72	cod	93	1
72	cod	57	1
72	sculpin		1
72	rock		1
72	tc		55
73	cod	66	1
73	cod	72	1
73	cod	53	1
73	cod	65	1
73	cod	80	1
73	cod	91	1
73	cod	73	1
73	cod	69	1
73	cod	88	1
73	cod	69	1
73	cod	72	1
73	tc		17
73	sculpin		1
74	cod	52	1
74	cod	55	1
74	cod	62	1
74	cod	73	1
74	cod	65	1
74	cod	61	1
74	cod	52	1
74	cod	69	1
74	cod	67	1
74	cod	59	1
74	cod	67	1
74	cod	66	1
74	cod	62	1
74	cod	67	1
74	cod	82	1
74	cod	64	1
74	cod	78	1
74	cod	54	1
74	cod	58	1
74	cod	63	1
74	cod	63	1
74	cod	80	1
74	cod	85	1
74	cod	68	1
74	tc		8
74	sculpin		3
75	cod	56	1
75	cod	64	1
75	cod	77	1
75	cod	53	1
75	cod	72	1
75	cod	63	1
75	cod	57	1
75	cod	86	1
75	cod	80	1
75	cod	49	1
75	cod	81	1
75	cod	62	1
75	cod	83	1
75	cod	49	1
75	cod	64	1
75	cod	73	1
75	cod	84	1
75	cod	84	1
75	cod	75	1
75	cod	67	1
75	cod	76	1
75	cod	87	1
75	cod	67	1
75	cod	61	1
75	cod	79	1
75	cod	58	1
75	cod	68	1
75	cod	59	1
75	cod	74	1
75	cod	68	1
75	cod	71	1
75	cod	60	1
75	cod	68	1
75	tc		50
75	sculpin		1
76	cod	49	1
76	cod	53	1
76	cod	51	1
76	cod	66	1
76	cod	64	1
76	cod	72	1
76	cod	63	1
76	cod	52	1
76	cod	70	1
76	cod	64	1
76	cod	50	1
76	cod	62	1
76	cod	58	1
76	cod	51	1
76	cod	75	1
76	cod	75	1
76	cod	83	1
76	cod	50	1
76	cod	52	1
76	cod	63	1
76	cod	60	1
76	cod	54	1
76	cod	64	1
76	cod	49	1
76	cod	51	1
76	cod	53	1
76	cod	60	1
76	cod	49	1
76	cod	49	1
76	cod	55	1
76	cod	54	1
76	cod	56	1
76	cod	52	1
76	cod	55	1
76	cod	55	1
76	cod	53	1
76	cod	54	1
76	cod	62	1
76	cod	57	1
76	cod	57	1
76	cod	70	1
76	tc		12
76	sculpin		2
77	cod	62	1
77	cod	50	1
77	cod	55	1
77	cod	48	1
77	cod	70	1
77	cod	55	1
77	cod	49	1
77	cod	50	1
77	cod	63	1
77	cod	79	1
77	cod	55	1
77	cod	52	1
77	cod	62	1
77	cod	63	1
77	cod	60	1
77	cod	52	1
77	cod	66	1
77	cod	51	1
77	cod	48	1
77	sculpin		4
77	rock		1
77	whelk		1
78	cod	60	1
78	cod	48	1
78	cod	47	1
78	cod	38	1
[truncated: 698 more rows]

## Sheet: Haul Durations
Date	Fisherman ID	Haul ID	Duration	Catch	Crew	Pot Type
2016-01-09	1	1	06:14:78	1	2	NL
2016-01-09	1	2	07:19:60	5	2	NLMod
2016-01-09	1	3	06:46:53	2	2	NL
2016-01-09	1	4	06:33:28	1	2	NL
2016-02-09	2	5	10:48:91	19	3	NL
2016-02-09	2	6	08:42:90	11	3	NL
